# Supplementary material
Source: publisher figshare collection journal article supplement (https://sage.figshare.com/ndownloader/files/23727668)
Supplement: Supplementary file 1 [file 23727668]

| Imitation                   |                     | Receptive Language                                     |                             | Joint Attention                          |                  | SGD Proficiency                                       |
|-----------------------------|---------------------|--------------------------------------------------------|-----------------------------|------------------------------------------|------------------|-------------------------------------------------------|
| One Syllable Words          | Gross Motor Actions | Identifies common objects                              | Follows one step directions | Give to request                          | Point to Request | Requesting up to 5 highly preferred items on the iPad |
| Two Syllable Words          | Fine Motor Actions  | Identifies common objects in pictures                  |                             | Point/show to comment                    |                  | Match Identical Objects                               |
|                             |                     | Demonstrates common actions (with and without objects) |                             | Statement-Statement with joint attention |                  | Match Identical iPad Pictures                         |
| Imitate Action with Objects |                     | Identifies actions in pictures (iPad pictures)         |                             |                                          |                  | Match objects to iPad Pictures                        |
|                             |                     |                                                        |                             |                                          |                  | 1 word request on iPad up to field of 25              |
|                             |                     |                                                        |                             |                                          |                  | Navigate 1 level of folder to make a 1 word request   |
